# Supplementary material for: Host–guest interaction induced room-temperature phosphorescence enhancement of organic dyes: a computational study
Source: Royal Society of Chemistry journal article supplement (doi:10.1039/d4cp00891j), 2024-01-01

## **Supporting Information**

# **Host-guest interaction induced room-temperature phosphorescence enhancement of organic dyes: a computational study**

Xiaoli Luo<sup>a</sup>, Yi Zeng<sup>a</sup>, Haoran Wei<sup>a</sup>, Xiaoyan Zheng<sup>a\*</sup>

<sup>a</sup>Key Laboratory of Cluster Science of Ministry of Education, Beijing Key Laboratory of Photoelectronic/Electro-  
photonic Conversion Materials, School of Chemistry and Chemical Engineering, Beijing Institute of Technology,  
Beijing, 100081, China.

# List of Contents

## I. Supplementary Figures S1-S13

**Fig. S1** The optimized unit cell structure of four host-guest complexes: (a) PYCl/CB[6], (b) PYBr/CB[6], (c) PYCl/CB[7], (d) PYBr/CB[7].

**Fig. S2** The QM/MM model of (a) PYCl, (b) PYCl/CB[6] and (c) PYCl/CB[7] with the representative distance between the plane of PY<sup>+</sup> and the counterion labeled.

**Fig. S3** The wavelength of Phosphorescence at T<sub>1</sub>-geometry calculated by different functionals, including TPSSH, B3LYP, BMK and M06-2X coupled with 6-31G\*\* basis set for PYBr.

**Fig. S4** Single-crystal X-ray diffraction analysis of (a) PYCl, (b) PYBr. The dotted line shows the  $\pi$ - $\pi$  interaction force between two adjacent molecules and hydrogen bond. Here, H-bond with the distance between the donor (D) and acceptor (A) atoms is less than 3.5 Å, and the angle of D-H-A is greater than 135°.

**Fig. S5** Intermolecular interactions of (a) PYCl/CB[6], (b) PYBr/CB[6], (c) PYCl/CB[7], (d) PYBr/CB[7].

**Fig. S6** The structural superposition and RMSD values of (a) PYCl, (b) PYBr, (c) PYCl/CB[6], (d) PYBr/CB[6], (e) PYCl/CB[7], (f) PYBr/CB[7] in the optimized S<sub>0</sub> and T<sub>1</sub> geometries in crystals

**Fig. S7** (a) The frontier molecular orbitals at S<sub>1</sub>-geometry of (a) PYCl/CB[7], PYBr/CB[7]. (b) The energy levels of key transition orbitals and the corresponding transition properties of PYBr, PYBr/CB[6] and PYBr/CB[7] at S<sub>1</sub>.

**Fig. S8** The transition orbitals for the excited singlet state S<sub>n</sub> (n≤4) of (a) PYCl, (b) PYBr, (c) PYCl/CB[6], (d) PYBr/CB[6], (e) PYCl/CB[7], (f) PYBr/CB[7].

**Fig. S9** The frontier natural molecule transition orbitals for the T<sub>1</sub> of (a) PYCl, (b) PYBr, (c) PYCl/CB[6], (d) PYBr/CB[6], (e) PYCl/CB[7], (f) PYBr/CB[7].

**Fig. S10** Energy level of HOMO, LUMO, and the corresponding energy gap based on T<sub>1</sub> geometries of the studied molecules. “H” means the “HOMO”, “L” means the “LUMO”.

**Fig. S11** Transition orbitals of the high-lying triplet states of (a) PYCl and (b) PYBr.

**Fig. S12** Transition orbitals of the high-lying triplet states of (a) PYCl/CB[6] and (b) PYBr/CB[6].

**Fig. S13** Transition orbitals of the high-lying triplet states of (a) PYCl/CB[7] and (b) PYBr/CB[7].

## II. Supplementary Tables S1-S9

**Table S1.** Table of unit cell parameters and cell volume for the host-guest complexes: PYCl/CB[6], PYBr/CB[6], PYCl/CB[7], PYBr/CB[7].

**Table S2.** Selected structural parameters of PYCl and PYBr at both the S<sub>0</sub> and T<sub>1</sub> geometry, the geometrical changes  $|\Delta(T_1-S_0)|$  in crystal, respectively.

**Table S3.** Selected structural parameters of PYCl/CB[6], PYBr/CB[6], PYCl/CB[7], PYBr/CB[7] at both the S<sub>0</sub> and T<sub>1</sub> geometry, the geometrical changes  $|\Delta(T_1-S_0)|$  in crystal, respectively.

**Table S4.** Calculated transition orbitals assignment and composition (%) of atoms in frontier molecule orbitals of PYCl, PYBr, PYCl/CB[6], PYBr/CB[6], PYCl/CB[7] and PYBr/CB[7] in S<sub>1</sub> state and T<sub>1</sub> state calculated by NAO method.

**Table S5.** Calculated vertical transition energy (eV), oscillator strength (*f*), assignments and transition nature in S<sub>n</sub> of PYCl, PYBr, PYCl/CB[6], PYBr/CB[6], PYCl/CB[7] and PYBr/CB[7].

**Table S6.** The calculated properties of the excited states of PYCl, PYBr, PYCl/CB[6], PYBr/CB[6], PYCl/CB[7] and PYBr/CB[7], including oscillator strength of the S<sub>1</sub> ( $f^{S_1-S_0}$ ) and the T<sub>1</sub> ( $f^{T_1-S_0}$ ), transition dipole moment both at S<sub>1</sub> ( $\mu^{S_1-S_0}$ ) and T<sub>1</sub> ( $\mu^{T_1-S_0}$ ), energy gap between the S<sub>1</sub> and T<sub>1</sub> ( $\Delta E_{T_1-S_0}$ ), spin orbit coupling constant ( $\xi_{T_1-S_1}$ ) between the S<sub>1</sub> and T<sub>1</sub>, and the ratio of  $\xi_{T_1-S_1}$  to  $\Delta E_{T_1-S_0}$  ( $\xi_{T_1-S_1}/\Delta E_{T_1-S_0}$ ).

**Table S7.** Calculated oscillator strength of the T<sub>1</sub> state ( $f^{T_1-S_0}$ ), vertical excitation energy of T<sub>1</sub>-S<sub>0</sub>, phosphorescence wavelength of T<sub>1</sub> calculated at BMK/6-31G\*\* level of PYCl, PYBr, PYCl/CB[6], PYBr/CB[6], PYCl/CB[7] and PYBr/CB[7] in crystal.

**Table S8.** Calculated phosphorescence radiation rate (*k<sub>p</sub>*) of PYCl, PYBr, PYCl/CB[6], PYBr/CB[6], PYCl/CB[7] and PYBr/CB[7] at BMK/6-31G\*\* level in crystal.

**Table S9.** Calculated reorganization energies ( $\lambda$ ) of PYCl, PYBr, PYCl/CB[6], PYBr/CB[6], PYCl/CB[7] and PYBr/CB[7] in crystal at BMK/6-31G(d,p) level by AP method.

## III. The optimized geometries and the corresponding coordinates of the QM region of the PYCl, PYBr and their complexes QM/MM models at both S<sub>0</sub> and T<sub>1</sub> states.

## I. Supplementary Figures

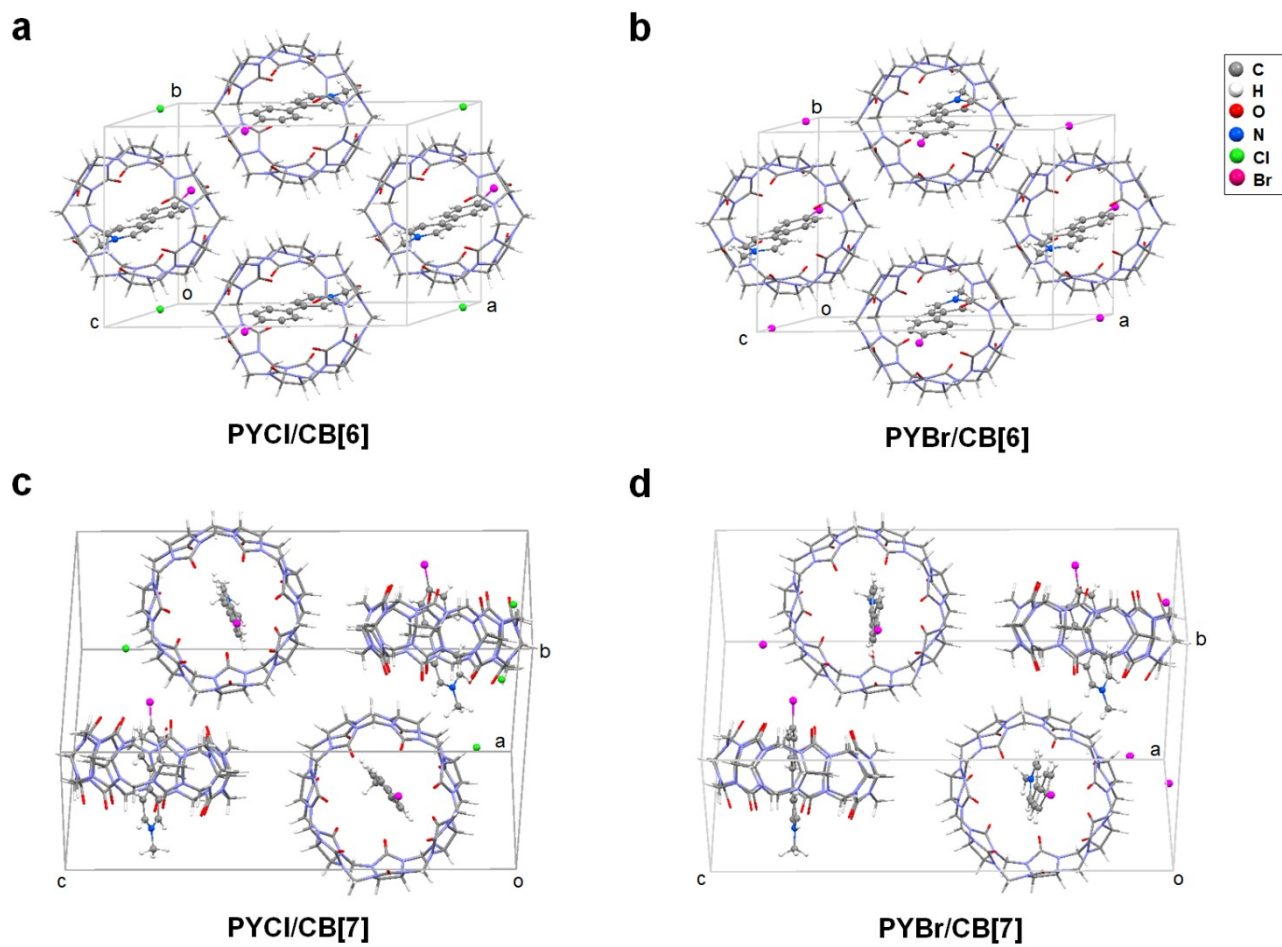

**Fig. S1** The optimized unit cell structure of four host-guest complexes: (a) PYCl/CB[6], (b) PYBr/CB[6], (c) PYCl/CB[7], (d) PYBr/CB[7].

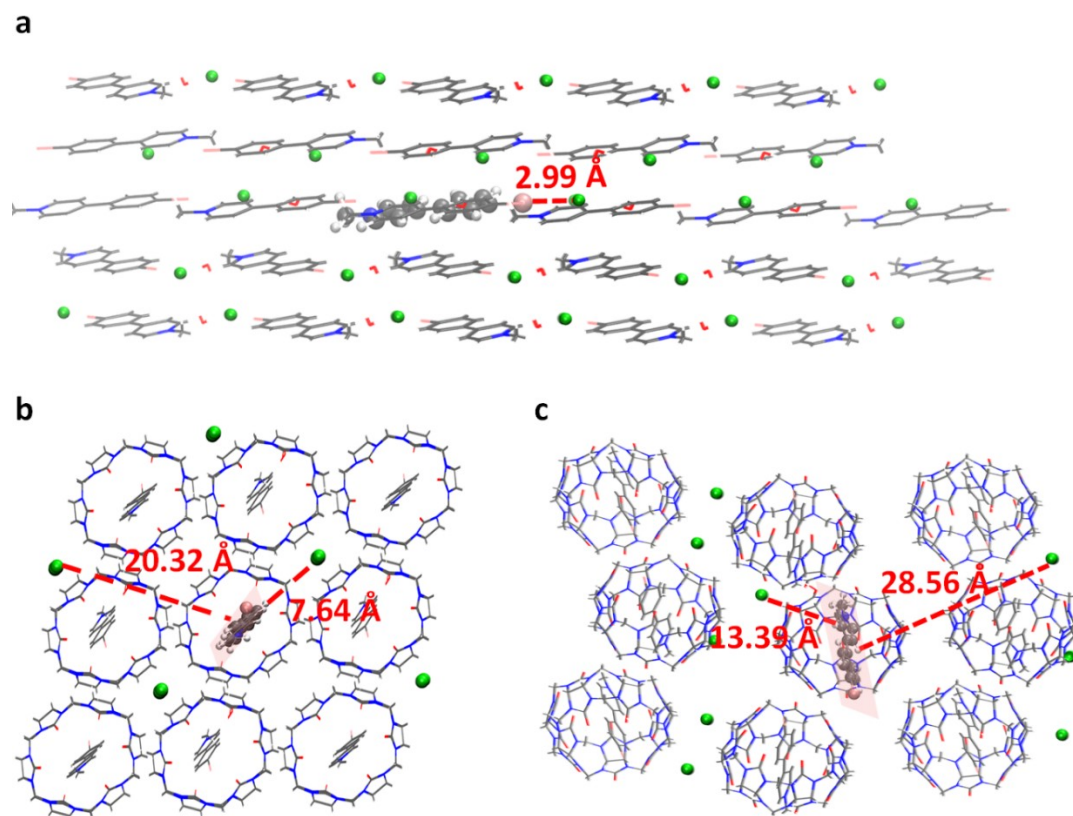

**Fig. S2** The QM/MM model of (a) PYCl, (b) PYCl/CB[6] and (c) PYCl/CB[7] with the representative distance between the plane of PY<sup>+</sup> and the counterion labeled.

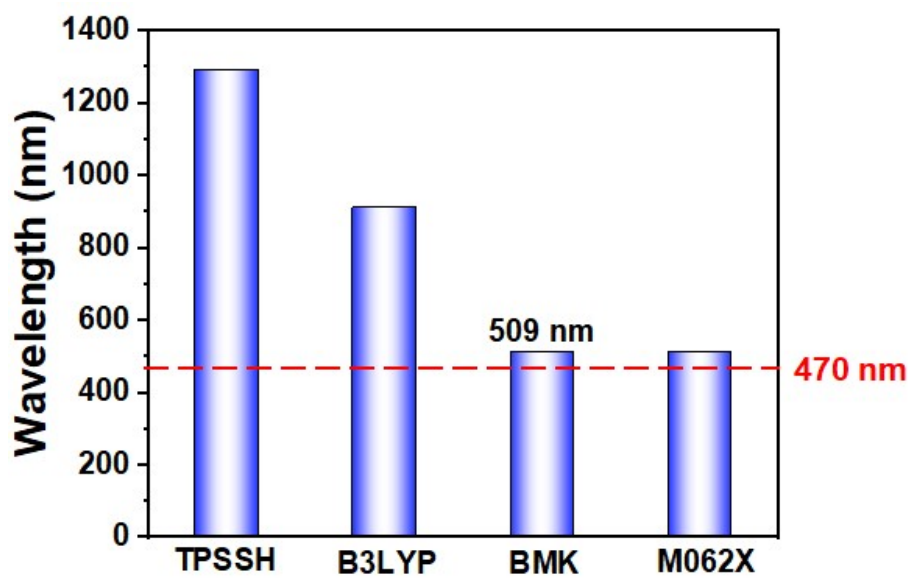

**Fig. S3** The wavelength of Phosphorescence at  $T_1$ -geometry calculated by different functionals, including TPSSH, B3LYP, BMK and M06-2X coupled with 6-31G\*\* basis set for PYBr.

**a**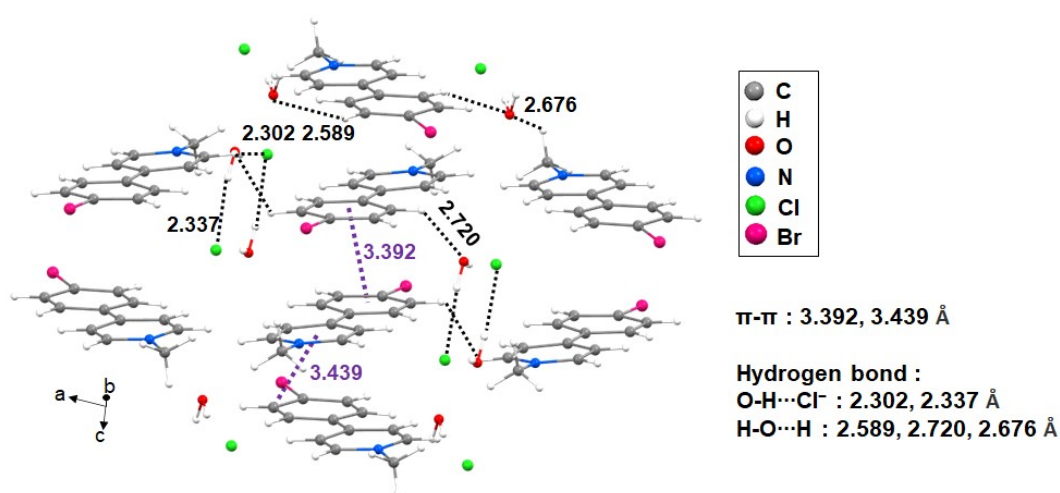**b**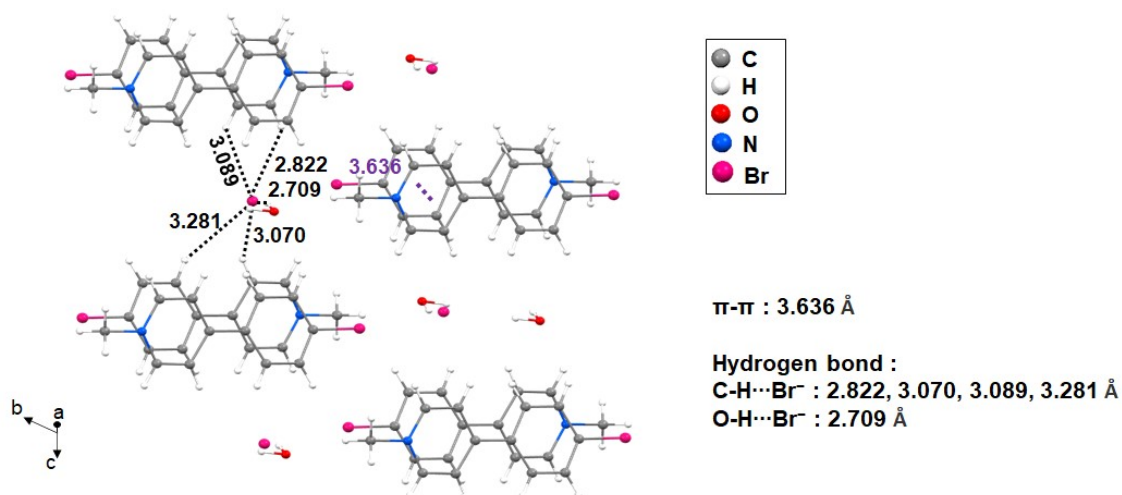

**Fig. S4** Single-crystal X-ray diffraction analysis of (a) PYCl, (b) PYBr. The dotted line shows the  $\pi$ - $\pi$  interaction force between two adjacent molecules and hydrogen bond. Here, H-bond with the distance between the donor (D) and acceptor (A) atoms is less than 3.5 Å, and the angle of D-H-A is greater than 135°.

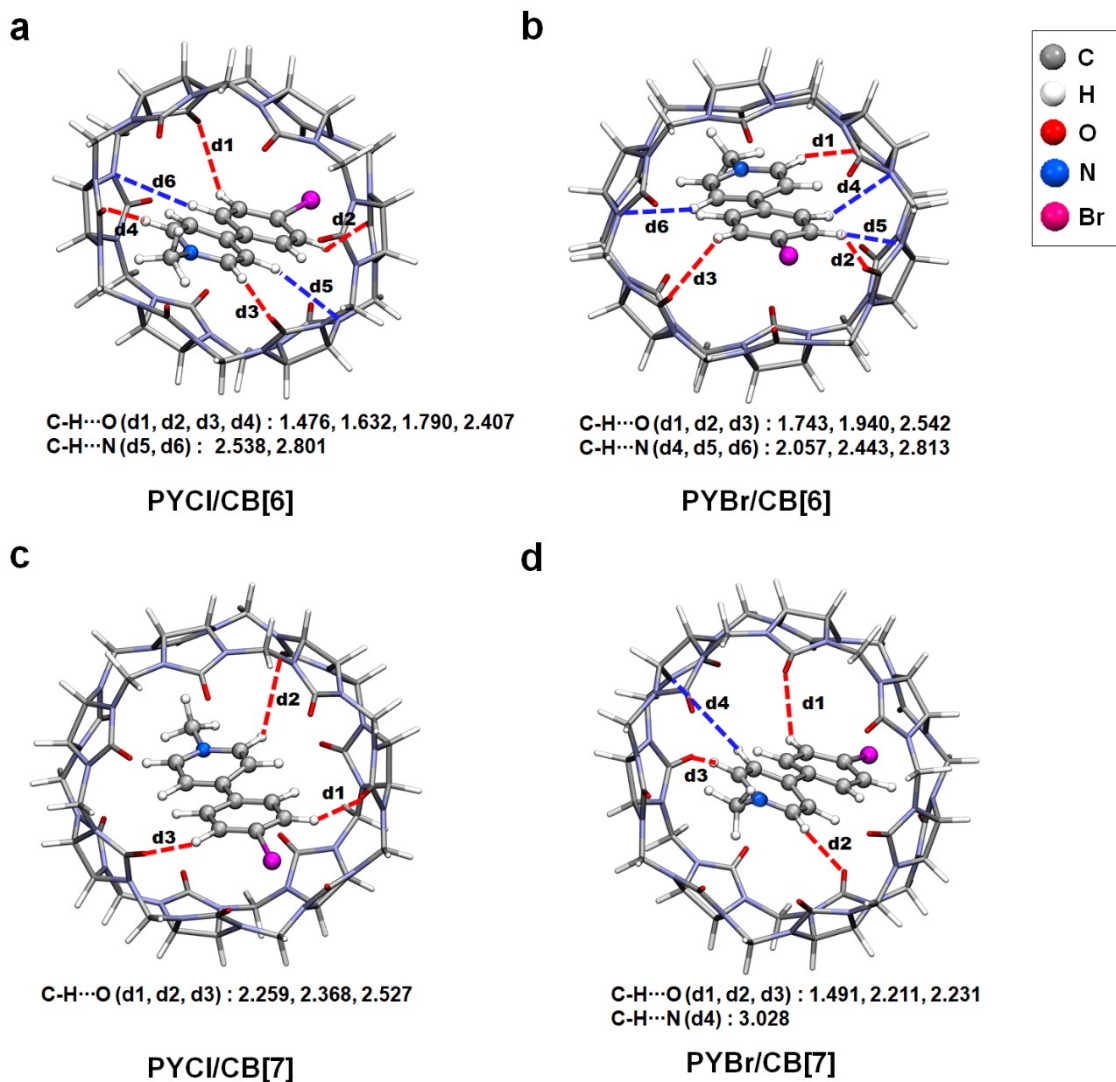

**Fig. S5** Intermolecular interactions of (a) PYCl/CB[6], (b) PYBr/CB[6], (c) PYCl/CB[7], (d) PYBr/CB[7].

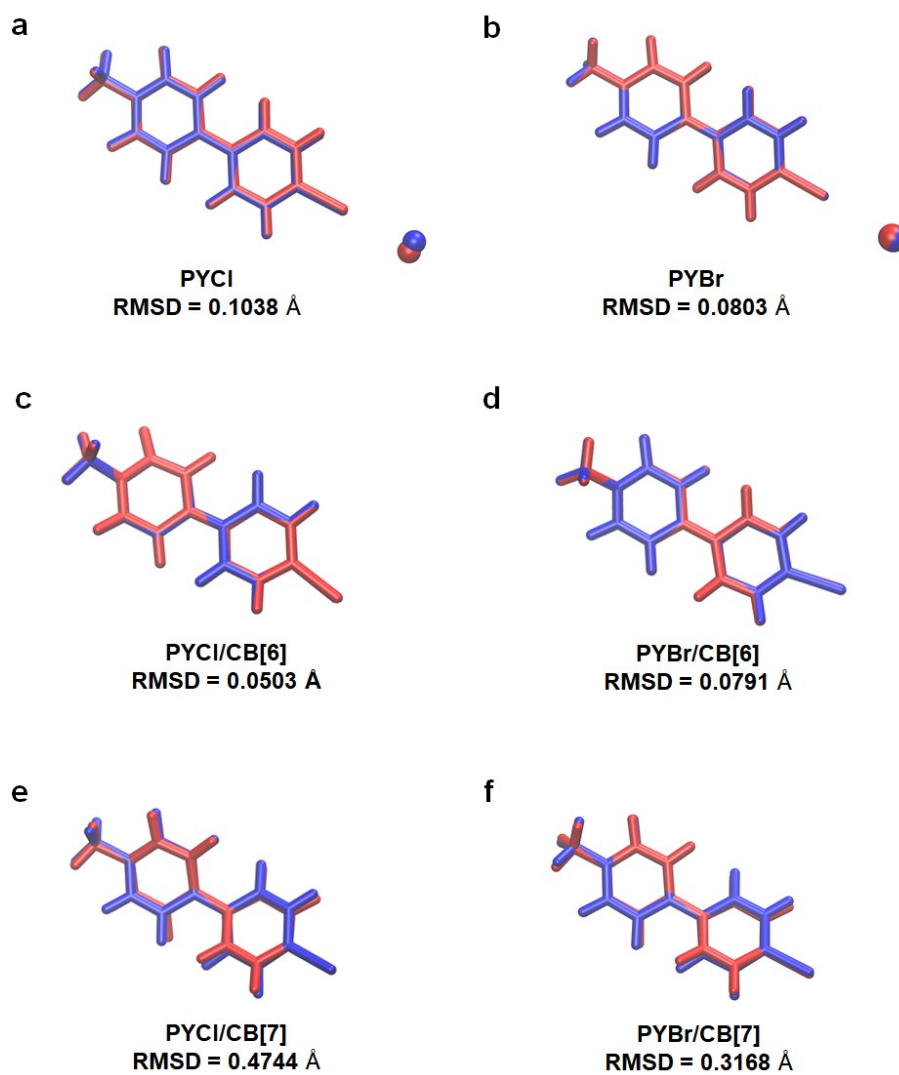

**Fig. S6** The structural superposition and RMSD values of (a) PYCl, (b) PYBr, (c) PYCl/CB[6], (d) PYBr/CB[6], (e) PYCl/CB[7], (f) PYBr/CB[7] in the optimized  $S_0$  and  $T_1$  geometries in crystals.



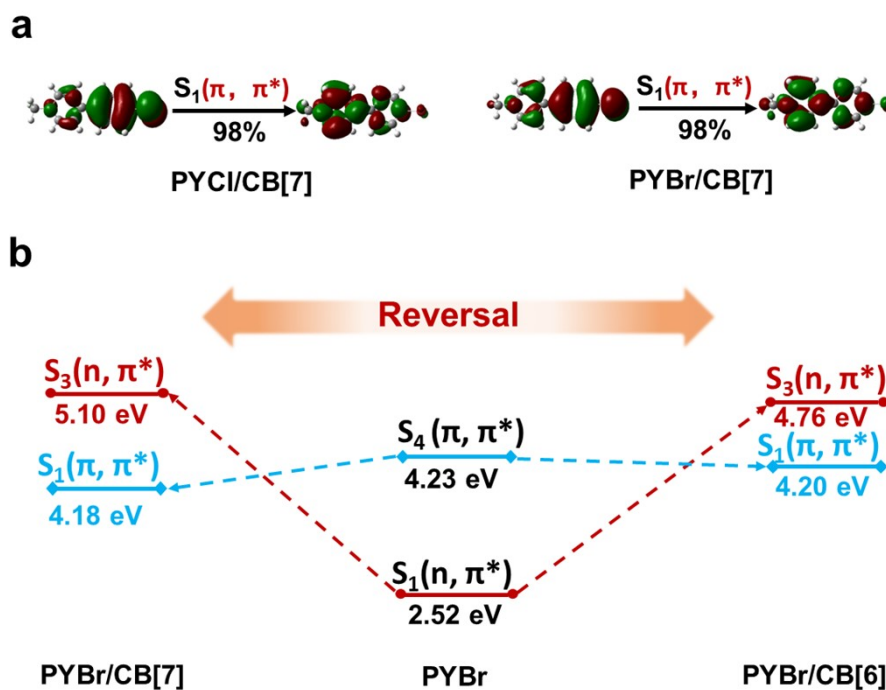

**Fig. S7** (a) The frontier molecular orbitals at  $S_1$ -geometry of (a) PYCl/CB[7], PYBr/CB[7]. (b) The energy levels of key transition orbitals and the corresponding transition properties of the PYBr, PYBr/CB[6] and PYBr/CB[7] at  $S_1$ .

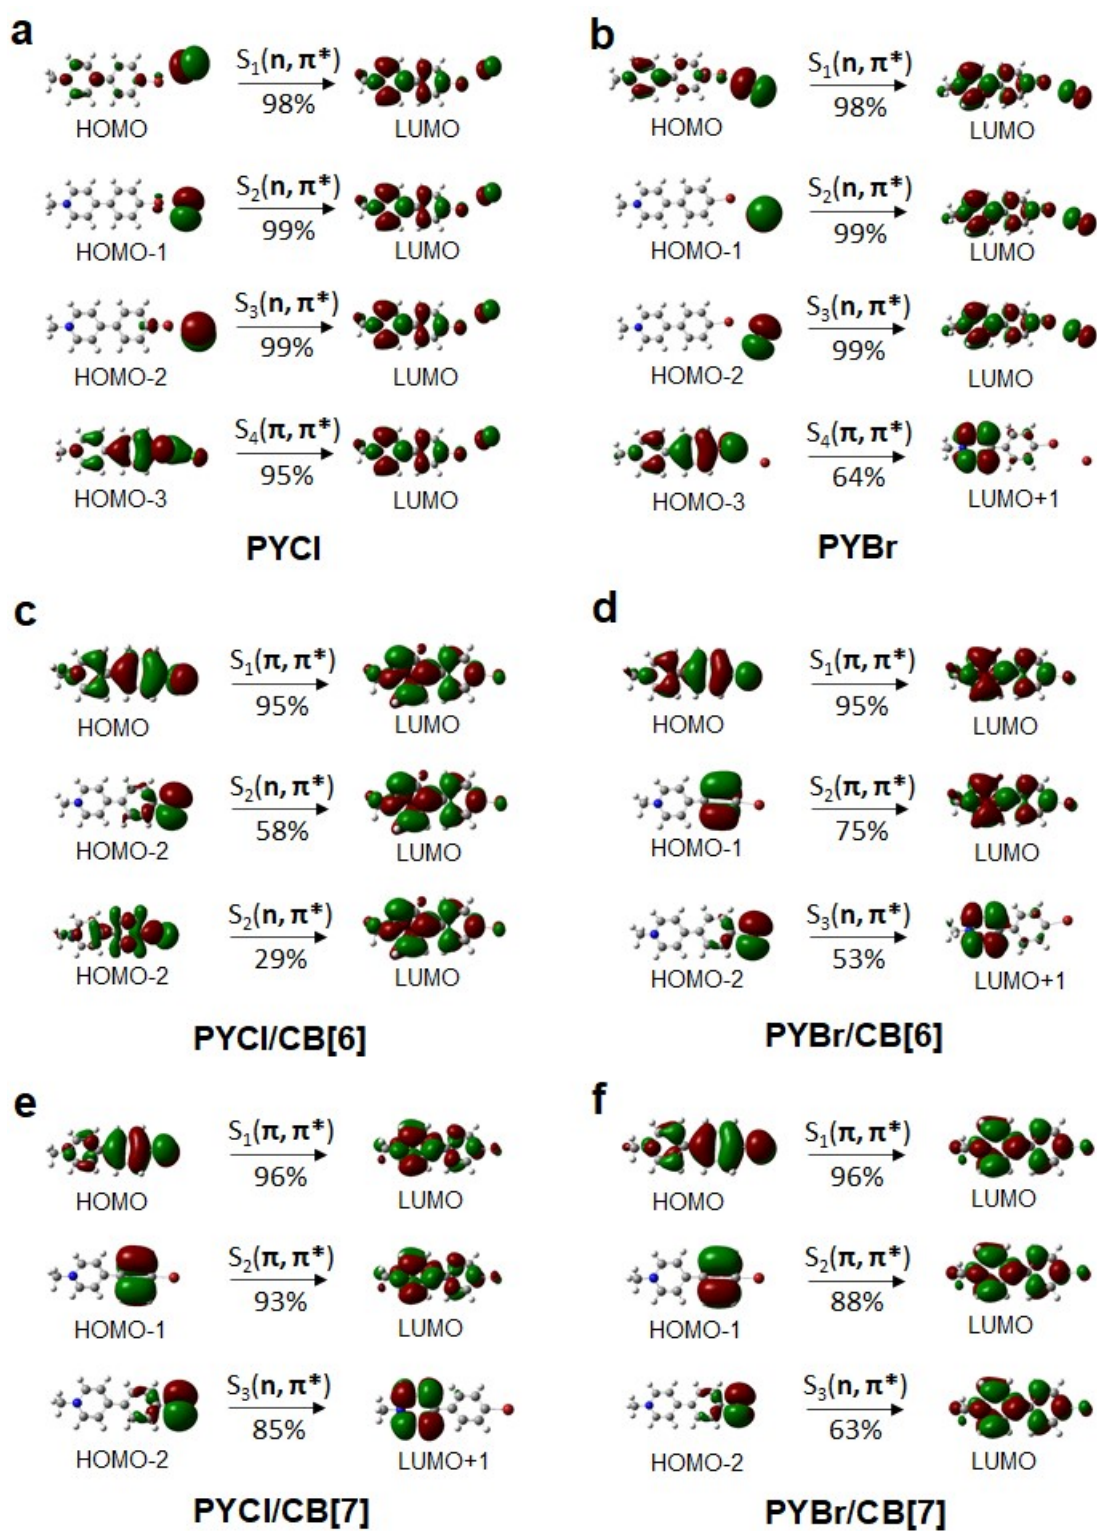

**Fig. S8** The transition orbitals for the excited singlet state  $S_n$  ( $n \leq 4$ ) of (a) PYCl, (b) PYBr, (c) PYCl/CB[6], (d) PYBr/CB[6], (e) PYCl/CB[7], (f) PYBr/CB[7].

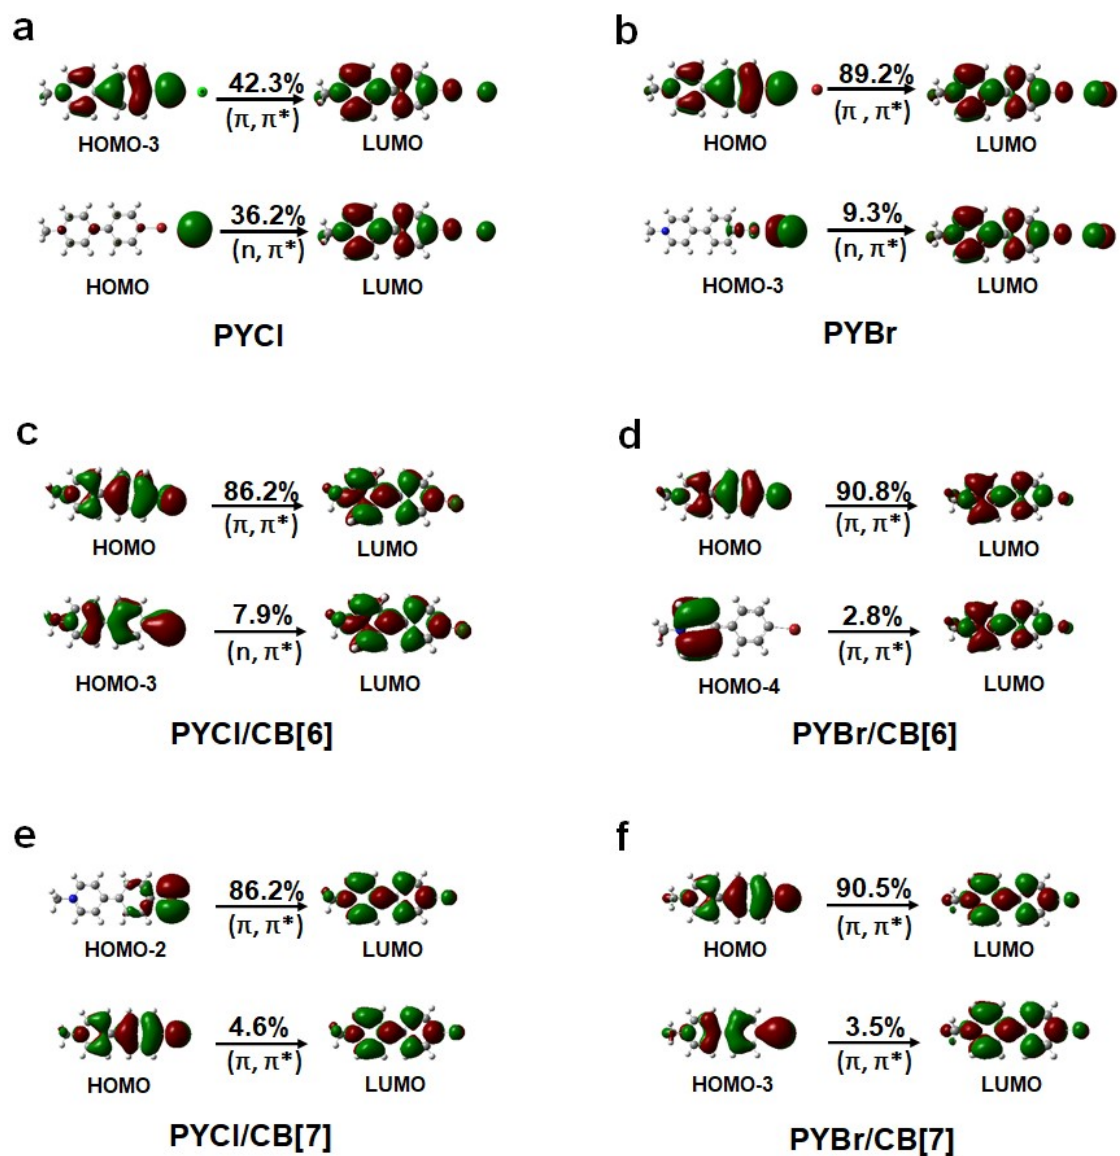

**Fig. S9** The frontier natural molecule transition orbitals for the  $T_1$  of (a) PYCl, (b) PYBr, (c) PYCl/CB[6], (d) PYBr/CB[6], (e) PYCl/CB[7], (f) PYBr/CB[7].

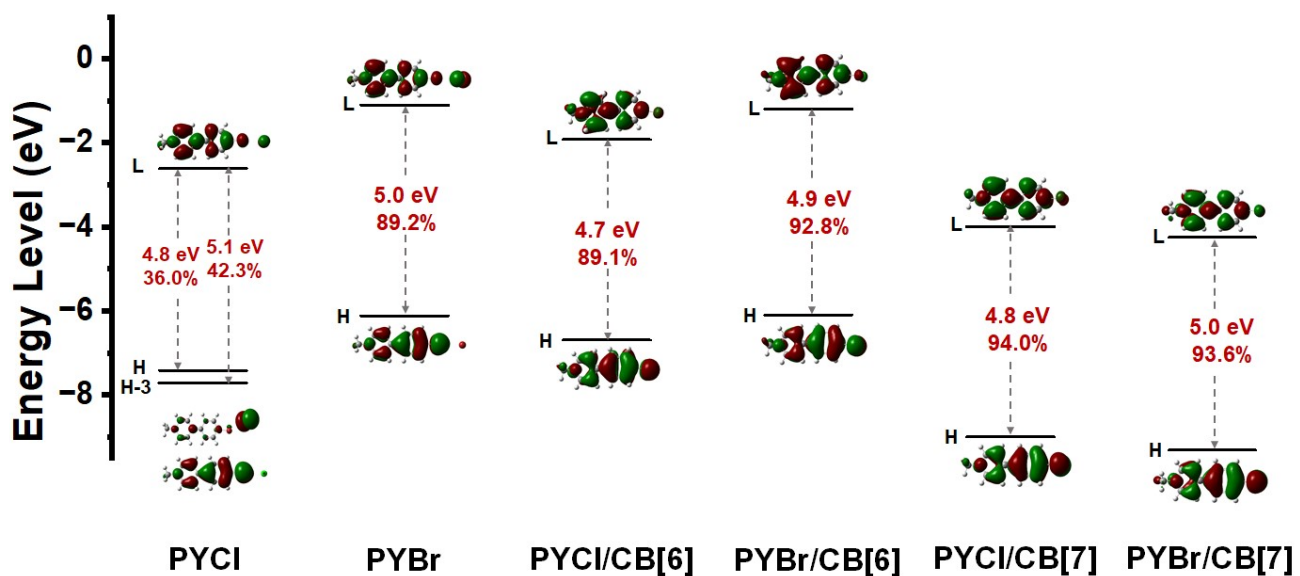

Fig. S10 Energy level of HOMO, LUMO, and the corresponding energy gap based on  $T_1$  geometries of the studied molecules. “H” means the “HOMO”, “L” means the “LUMO”.

**a**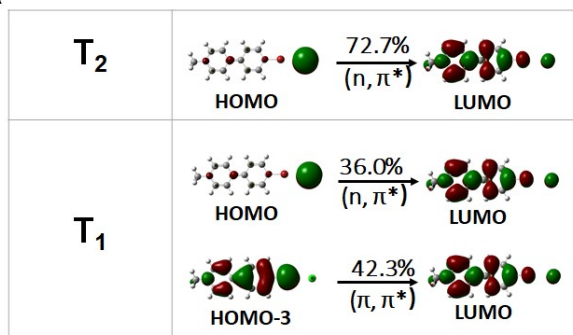

PYCl

**b**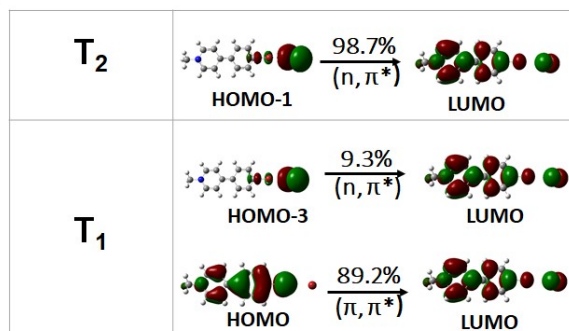

PYBr

**Fig. S11** Transition orbitals of the high-lying triplet states of (a) PYCl and (b) PYBr.

a

| PYCl/CB[6]                                                                                                                                                             |                                                                                                                                                                                                                                                                                                                                                  |                                                                                                                                                                                                                                                                   |
|------------------------------------------------------------------------------------------------------------------------------------------------------------------------|--------------------------------------------------------------------------------------------------------------------------------------------------------------------------------------------------------------------------------------------------------------------------------------------------------------------------------------------------|-------------------------------------------------------------------------------------------------------------------------------------------------------------------------------------------------------------------------------------------------------------------|
| $T_1$                                                                                                                                                                  | $T_2$                                                                                                                                                                                                                                                                                                                                            | $T_3$                                                                                                                                                                                                                                                             |
| 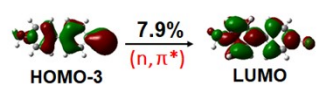<br> | <br><br><br> | <br><br> |

b

| PYBr/CB[6]                                                                                                                                                                                                                                                        |                                                                                                                                                                                                                                                                   |                                                                                                                                                                                                                                                                                                                                                                  |
|-------------------------------------------------------------------------------------------------------------------------------------------------------------------------------------------------------------------------------------------------------------------|-------------------------------------------------------------------------------------------------------------------------------------------------------------------------------------------------------------------------------------------------------------------|------------------------------------------------------------------------------------------------------------------------------------------------------------------------------------------------------------------------------------------------------------------------------------------------------------------------------------------------------------------|
| $T_1$                                                                                                                                                                                                                                                             | $T_2$                                                                                                                                                                                                                                                             | $T_3$                                                                                                                                                                                                                                                                                                                                                            |
| 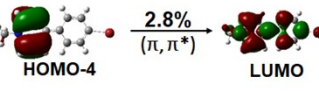<br>                                                                                         | <br>                                                                                         | <br>                                                                                                                                                                                    |
| $T_4$                                                                                                                                                                                                                                                             | $T_5$                                                                                                                                                                                                                                                             | $T_6$                                                                                                                                                                                                                                                                                                                                                            |
| <br><br> | <br><br> | <br><br><br> |

Fig. S12 Transition orbitals of the high-lying triplet states of (a) PYCl/CB[6] and (b) PYBr/CB[6].

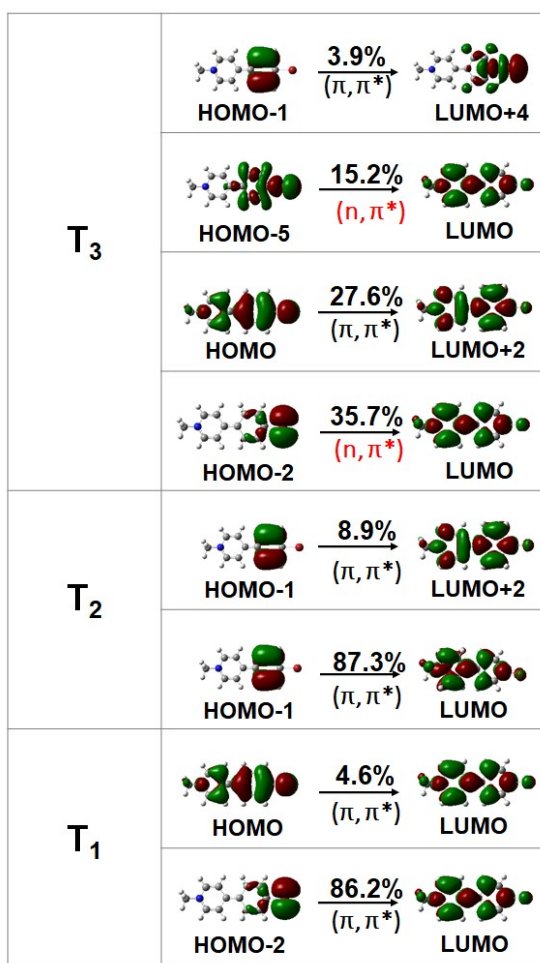

PYCl/CB[7]

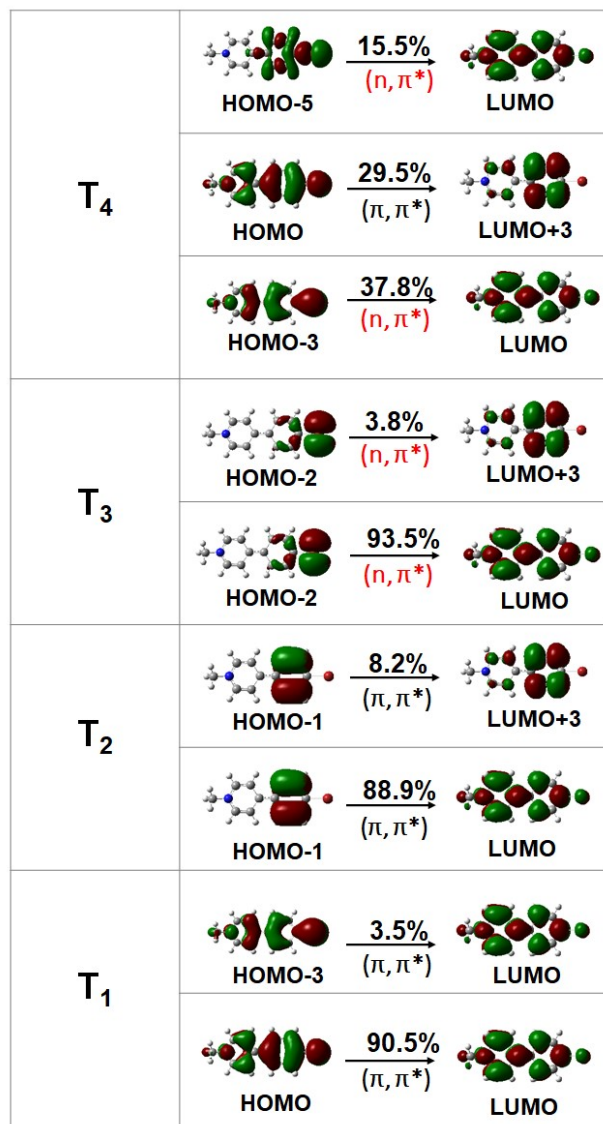

PYBr/CB[7]

Fig. S13 Transition orbitals of the high-lying triplet states of (a) PYCl/CB[7] and (b) PYBr/CB[7].

## II. Supplementary Tables

**Table S1.** Table of unit cell parameters and cell volume for the host-guest complexes: PYCl/CB[6], PYBr/CB[6], PYCl/CB[7], PYBr/CB[7].

| Complexes  | $a$ (Å) | $b$ (Å) | $c$ (Å) | $\alpha$ | $\beta$ | $\gamma$ | Volume (Å <sup>3</sup> ) |
|------------|---------|---------|---------|----------|---------|----------|--------------------------|
| PYCl/CB[6] | 20.74   | 13.97   | 10.68   | 90.00    | 120.97  | 90.00    | 2652.88                  |
| PYBr/CB[6] | 20.86   | 13.99   | 10.88   | 90.11    | 121.42  | 89.87    | 2709.62                  |
| PYCl/CB[7] | 12.85   | 20.13   | 31.66   | 90.00    | 92.59   | 90.00    | 8185.58                  |
| PYBr/CB[7] | 12.95   | 19.91   | 32.27   | 89.97    | 91.26   | 89.96    | 8319.44                  |



**Table S2.** Selected structural parameters of PYCl and PYBr at both the  $S_0$  and  $T_1$  geometry, the geometrical changes  $|\Delta(T_1-S_0)|$  in crystal, respectively.

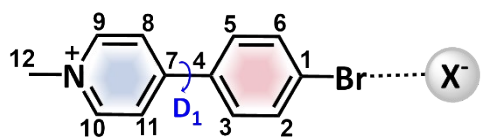

|       |               | PYCl   |        |                     | PYBr   |        |                     |
|-------|---------------|--------|--------|---------------------|--------|--------|---------------------|
|       |               | $S_0$  | $T_1$  | $ \Delta(T_1-S_0) $ | $S_0$  | $T_1$  | $ \Delta(T_1-S_0) $ |
|       | Br- $X^-$     | 3.00   | 2.99   | 0.01                | 3.26   | 3.23   | 0.03                |
|       | C1-Br         | 2.00   | 1.96   | 0.04                | 2.01   | 1.98   | 0.03                |
|       | C4-C7         | 1.48   | 1.41   | 0.07                | 1.48   | 1.41   | 0.07                |
|       | C2-C1-Br      | 120.12 | 120.76 | 0.64                | 119.27 | 119.59 | 0.32                |
|       | C11-C7-C4     | 122.13 | 122.61 | 0.48                | 120.17 | 120.07 | 0.10                |
| $D_1$ | C5-C4-C17-C11 | 0.70   | 1.08   | 0.38                | 15.91  | 8.13   | 7.78                |

**Table S3.** Selected structural parameters of PYCl/CB[6], PYBr/CB[6], PYCl/CB[7], PYBr/CB[7] at both the  $S_0$  and  $T_1$  geometry, the geometrical changes  $|\Delta(T_1-S_0)|$  in crystal, respectively.

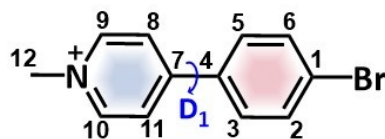

|                     | PYCl/CB[6] |        |                     | PYBr/CB[6] |        |                     | PYCl/CB[7] |        |                     | PYBr/CB[7] |        |                     |
|---------------------|------------|--------|---------------------|------------|--------|---------------------|------------|--------|---------------------|------------|--------|---------------------|
|                     | $S_0$      | $T_1$  | $ \Delta(T_1-S_0) $ |
| C1-Br               | 2.05       | 2.00   | 0.05                | 2.13       | 2.10   | 0.03                | 2.02       | 1.99   | 0.03                | 2.02       | 1.99   | 0.03                |
| C4-C7               | 1.44       | 1.38   | 0.06                | 1.47       | 1.39   | 0.08                | 1.48       | 1.41   | 0.07                | 1.48       | 1.41   | 0.07                |
| C2-C1-Br            | 114.72     | 114.59 | 0.13                | 126.32     | 127.27 | 0.95                | 118.31     | 118.61 | 0.30                | 118.21     | 118.75 | 0.74                |
| C11-C7-C4           | 120.65     | 120.67 | 0.02                | 121.89     | 122.92 | 1.03                | 120.78     | 121.99 | 1.21                | 120.99     | 122.72 | 1.73                |
| $D_1$ C5-C4-C17-C11 | 1.24       | 1.11   | 0.13                | 1.08       | 2.20   | 1.12                | 34.58      | 1.16   | 33.42               | 29.48      | 6.67   | 22.81               |

**Table S4.** Calculated transition orbitals assignment and composition (%) of atoms in frontier molecule orbitals of PYCl, PYBr, PYCl/CB[6], PYBr/CB[6], PYCl/CB[7] and PYBr/CB[7] in S<sub>1</sub> state and T<sub>1</sub> state calculated by NAO method.

| Compounds  | S <sub>1</sub>  |        |        |         | T <sub>1</sub>    |        |        |         |
|------------|-----------------|--------|--------|---------|-------------------|--------|--------|---------|
|            | Assignments     | n      | π      | nature  | Assignment        | n      | π      | nature  |
| PYCl       | HOMO→LUMO (97%) | 81.70% | 16.10% | (n, π*) | HOMO-3→LUMO (42%) | 47.60% | 51.30% | (π, π*) |
|            |                 |        |        |         | HOMO→LUMO (36%)   | 89.20% | 5.70%  | (n, π*) |
| PYBr       | HOMO→LUMO (98%) | 79.90% | 18.30% | (n, π*) | HOMO-3→LUMO (89%) | 42.00% | 62.10% | (π, π*) |
| PYCl/CB[6] | HOMO→LUMO (97%) | 30.10% | 64.50% | (π, π*) | HOMO→LUMO (89%)   | 25.60% | 68.90% | (π, π*) |
| PYBr/CB[6] | HOMO→LUMO (98%) | 28.10% | 67.80% | (π, π*) | HOMO→LUMO (93%)   | 24.50% | 71.10% | (π, π*) |
| PYCl/CB[7] | HOMO→LUMO (98%) | 31.60% | 66.10% | (π, π*) | HOMO→LUMO (94%)   | 29.50% | 67.80% | (π, π*) |
| PYBr/CB[7] | HOMO→LUMO (98%) | 32.10% | 65.30% | (π, π*) | HOMO→LUMO (94%)   | 29.40% | 67.70% | (π, π*) |

**Table S5.** Calculated vertical transition energy (eV), oscillator strength ( $f$ ), assignments and transition nature in  $S_n$  of PYCl, PYBr, PYCl/CB[6], PYBr/CB[6], PYCl/CB[7] and PYBr/CB[7].

|            | States         | Energy (eV) | $f$    | Assignments                               | nature              |
|------------|----------------|-------------|--------|-------------------------------------------|---------------------|
| PYCl       | S <sub>1</sub> | 3.06        | 0.0131 | HOMO→LUMO (98%)                           | (n, $\pi^*$ )       |
|            | S <sub>2</sub> | 3.46        | 0.0001 | HOMO-1→LUMO (99%)                         | (n, $\pi^*$ )       |
|            | S <sub>3</sub> | 3.48        | 0.0370 | HOMO-2→LUMO (99%)                         | (n, $\pi^*$ )       |
|            | S <sub>4</sub> | 4.14        | 0.0100 | HOMO-3→LUMO (95%)                         | ( $\pi$ , $\pi^*$ ) |
| PYBr       | S <sub>1</sub> | 2.52        | 0.0065 | HOMO→LUMO (98%)                           | (n, $\pi^*$ )       |
|            | S <sub>2</sub> | 2.60        | 0.0014 | HOMO-1→LUMO (99%)                         | (n, $\pi^*$ )       |
|            | S <sub>3</sub> | 2.66        | 0.0008 | HOMO-2→LUMO (99%)                         | (n, $\pi^*$ )       |
|            | S <sub>4</sub> | 4.23        | 0.0040 | HOMO→LUMO+1 (64%)<br>HOMO-3→LUMO (25%)    | ( $\pi$ , $\pi^*$ ) |
| PYCl/CB[6] | S <sub>1</sub> | 3.84        | 0.8343 | HOMO→LUMO (95%)                           | ( $\pi$ , $\pi^*$ ) |
|            | S <sub>2</sub> | 4.44        | 0.0149 | HOMO-2→LUMO (58%)<br>HOMO-1→LUMO (29%)    | (n, $\pi^*$ )       |
| PYBr/CB[6] | S <sub>1</sub> | 4.20        | 0.8619 | HOMO→LUMO (95%)                           | ( $\pi$ , $\pi^*$ ) |
|            | S <sub>2</sub> | 4.64        | 0.0024 | HOMO-1→LUMO (75%)<br>HOMO→LUMO+1 (10%)    | ( $\pi$ , $\pi^*$ ) |
|            | S <sub>3</sub> | 4.76        | 0.0020 | HOMO-2→LUMO+1 (53%)<br>HOMO→LUMO+1 (20%)  | (n, $\pi^*$ )       |
| PYCl/CB[7] | S <sub>1</sub> | 4.00        | 0.6218 | HOMO→LUMO (96%)                           | ( $\pi$ , $\pi^*$ ) |
|            | S <sub>2</sub> | 4.35        | 0.0184 | HOMO-1→LUMO (93%)                         | ( $\pi$ , $\pi^*$ ) |
|            | S <sub>3</sub> | 5.02        | 0.0006 | HOMO-1→LUMO+1 (5%)<br>HOMO-2→LUMO+1 (85%) | (n, $\pi^*$ )       |
| PYBr/CB[7] | S <sub>1</sub> | 4.18        | 0.8000 | HOMO→LUMO (96%)                           | ( $\pi$ , $\pi^*$ ) |
|            | S <sub>2</sub> | 4.47        | 0.0237 | HOMO-1→LUMO (88%)                         | ( $\pi$ , $\pi^*$ ) |
|            | S <sub>3</sub> | 5.10        | 0.0086 | HOMO→LUMO+1 (23%)<br>HOMO-2→LUMO (63%)    | (n, $\pi^*$ )       |

**Table S6.** The calculated properties of the excited states of PYCl, PYBr, PYCl/CB[6], PYBr/CB[6], PYCl/CB[7] and PYBr/CB[7], including oscillator strength of the  $S_1$  ( $f_{S_1-S_0}$ ) and the  $T_1$  ( $f_{T_1-S_0}$ ), transition dipole moment both at  $S_1$  ( $\mu_{S_1-S_0}$ ) and  $T_1$  ( $\mu_{T_1-S_0}$ ), energy gap between the  $S_1$  and  $T_1$  ( $\Delta E_{T_1-S_0}$ ), spin orbit coupling constant ( $\xi_{T_1-S_1}$ ) between the  $S_1$  and  $T_1$ , and the ratio of  $\xi_{T_1-S_1}$  to  $\Delta E_{T_1-S_0}$  ( $\xi_{T_1-S_1}/\Delta E_{T_1-S_0}$ ).

| Samples    | $f_{S_1-S_0}$ | $f_{T_1-S_0}$<br>( $10^{-7}$ ) | $\mu_{T_1-S_0}$<br>(Debye) | $\mu_{S_1-S_0}$<br>(Debye) | $\Delta E_{T_1-S_0}$<br>(eV) | $\xi_{T_1-S_1}$<br>( $\text{cm}^{-1}$ ) | $\xi_{T_1-S_1}/\Delta E_{T_1-S_0}$<br>( $\text{cm}^{-1}/\text{eV}$ ) |
|------------|---------------|--------------------------------|----------------------------|----------------------------|------------------------------|-----------------------------------------|----------------------------------------------------------------------|
| PYCl       | 0.1051        | 0.96                           | 0.0035                     | 3.02                       | 0.52                         | 2.68                                    | 5.15                                                                 |
| PYBr       | 0.0058        | 0.98                           | 0.0036                     | 0.78                       | 0.10                         | 1.62                                    | 16.2                                                                 |
| PYCl/CB[6] | 0.6402        | 6.72                           | 0.0095                     | 6.78                       | 1.17                         | 7.27                                    | 6.21                                                                 |
| PYBr/CB[6] | 0.7605        | 4.47                           | 0.0080                     | 7.04                       | 1.51                         | 2.29                                    | 1.51                                                                 |
| PYCl/CB[7] | 0.5049        | 1.14                           | 0.0039                     | 5.86                       | 0.98                         | 0.77                                    | 0.79                                                                 |
| PYBr/CB[7] | 0.7345        | 0.99                           | 0.0036                     | 6.97                       | 1.32                         | 0.30                                    | 0.23                                                                 |

**Table S7.** Calculated oscillator strength of the  $T_1$  state ( $f_{T_1-S_0}$ ), vertical excitation energy of  $T_1-S_0$ , phosphorescence wavelength of  $T_1$  calculated at BMK/6-31G\*\* level of PYCl, PYBr, PYCl/CB[6], PYBr/CB[6], PYCl/CB[7] and PYBr/CB[7] in crystal.

| Compounds  | $f_{T_1-S_0}$<br>( $10^{-7}$ ) | $\Delta E_{T_1-S_0}$<br>(eV) | Emission (Cal.)<br>(nm) | Emission (Exp.)<br>(nm) |
|------------|--------------------------------|------------------------------|-------------------------|-------------------------|
| PYCl       | 0.96                           | 2.59                         | 478                     | 426                     |
| PYBr       | 0.98                           | 2.44                         | 509                     | 470                     |
| PYCl/CB[6] | 6.72                           | 2.24                         | 554                     | 500                     |
| PYBr/CB[6] | 4.47                           | 2.26                         | 549                     | 500                     |
| PYCl/CB[7] | 1.14                           | 2.25                         | 550                     | 482                     |
| PYBr/CB[7] | 0.99                           | 2.30                         | 539                     | /                       |

**Table S8.** Calculated phosphorescence radiation rate ( $k_p$ ) of PYCl, PYBr, PYCl/CB[6], PYBr/CB[6], PYCl/CB[7] and PYBr/CB[7] at BMK/6-31G\*\* level in crystal.

|                          | PYCl               | PYBr               | PYCl/CB[6]         | PYBr/CB[6]         | PYCl/CB[7]         | PYBr/CB[7]         |
|--------------------------|--------------------|--------------------|--------------------|--------------------|--------------------|--------------------|
| $k_p$ (s <sup>-1</sup> ) | $2.80 \times 10^1$ | $2.53 \times 10^1$ | $2.08 \times 10^2$ | $1.49 \times 10^2$ | $2.50 \times 10^1$ | $2.28 \times 10^1$ |

**Table S9.** Calculated reorganization energies ( $\lambda$ ) of PYCl, PYBr, PYCl/CB[6], PYBr/CB[6], PYCl/CB[7] and PYBr/CB[7] in crystal at BMK/6-31G(d,p) level by AP method.

|            | $\lambda$ (meV) |
|------------|-----------------|
| PYCl       | 712             |
| PYBr       | 691             |
| PYCl/CB[6] | 629             |
| PYBr/CB[6] | 651             |
| PYCl/CB[7] | 932             |
| PYBr/CB[7] | 865             |



### III. The optimized geometries and the corresponding coordinates of the QM region of the PYCl, PYBr and their complexes at both $S_0$ and $T_1$ states.

**Structure S1.** The optimized geometry and the corresponding coordinate of the QM region of PYCl crystal at  $S_0$  state

|    |              |             |             |
|----|--------------|-------------|-------------|
| Br | -0.51394900  | 1.83157300  | 0.51570800  |
| N  | -8.80106400  | -1.69135800 | -0.55256700 |
| C  | -10.15028600 | -2.26242800 | -0.61452100 |
| H  | -10.16166700 | -3.10556600 | -1.30402300 |
| H  | -10.85068300 | -1.50848200 | -0.97796900 |
| H  | -10.41008900 | -2.57309600 | 0.39914000  |
| C  | -7.72804400  | -2.45489100 | -0.82811900 |
| H  | -7.92757400  | -3.44575200 | -1.22010100 |
| C  | -6.44380100  | -1.98511000 | -0.62886300 |
| H  | -5.62654800  | -2.66242400 | -0.85032400 |
| C  | -6.23244800  | -0.67419600 | -0.14608000 |
| C  | -7.39217200  | 0.09938700  | 0.10034700  |
| H  | -7.34662000  | 1.12499100  | 0.44330400  |
| C  | -8.64779300  | -0.43237700 | -0.09811500 |
| H  | -9.55326700  | 0.13317100  | 0.10139400  |
| C  | -4.87776500  | -0.12124600 | 0.06266100  |
| C  | -4.71474900  | 1.19194100  | 0.54691000  |
| H  | -5.56652200  | 1.79513800  | 0.83165900  |
| C  | -3.44836600  | 1.74471700  | 0.70632900  |
| H  | -3.35150100  | 2.74819900  | 1.11125000  |
| C  | -2.32051300  | 0.98859100  | 0.37231000  |
| C  | -2.45482900  | -0.32952700 | -0.07521800 |
| H  | -1.57718200  | -0.91715100 | -0.32888300 |
| C  | -3.72611900  | -0.88117600 | -0.22787000 |
| H  | -3.80042100  | -1.90602200 | -0.57456300 |
| Cl | 2.10299900   | 3.26829700  | 0.77721300  |

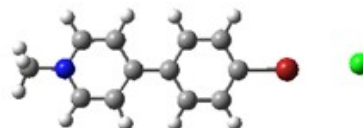

**Structure S2.** The optimized geometry and the corresponding coordinate of the QM region of PYCl crystal at  $T_1$  state

|    |              |             |             |
|----|--------------|-------------|-------------|
| Br | -0.53061100  | 1.84840200  | 0.48098200  |
| N  | -8.78272800  | -1.69066500 | -0.56062800 |
| C  | -10.12098000 | -2.26565900 | -0.60323400 |
| H  | -10.13854000 | -3.11202700 | -1.28948400 |
| H  | -10.83248500 | -1.51710900 | -0.95932200 |
| H  | -10.37923700 | -2.57768700 | 0.41303700  |
| C  | -7.69314000  | -2.46511300 | -0.83899700 |
| H  | -7.89992500  | -3.45344000 | -1.23114300 |
| C  | -6.42081000  | -2.00146400 | -0.64712800 |
| H  | -5.60497100  | -2.67804100 | -0.87446800 |
| C  | -6.19472000  | -0.65864700 | -0.14927900 |
| C  | -7.39136400  | 0.12139200  | 0.10424300  |
| H  | -7.34999600  | 1.14757000  | 0.44622100  |
| C  | -8.63062100  | -0.41015800 | -0.09874400 |
| H  | -9.54214500  | 0.14693900  | 0.09052600  |
| C  | -4.90184500  | -0.13454500 | 0.06496300  |
| C  | -4.71375300  | 1.22535600  | 0.58402600  |
| H  | -5.56894800  | 1.80217700  | 0.90525400  |
| C  | -3.46810900  | 1.76521200  | 0.72339300  |
| H  | -3.35998900  | 2.76086800  | 1.14617800  |
| C  | -2.30708900  | 1.00876200  | 0.36025100  |
| C  | -2.44861600  | -0.34698100 | -0.08328700 |
| H  | -1.56034700  | -0.92232500 | -0.33023800 |
| C  | -3.68747600  | -0.90927000 | -0.21944200 |
| H  | -3.76647000  | -1.93942600 | -0.54357300 |
| Cl | 2.08806800   | 3.26122000  | 0.77870000  |

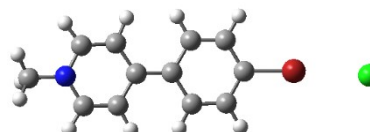

**Structure S3.** The optimized geometry and the corresponding coordinate of the QM region of PYBr crystal at  $S_0$  state

|    |             |             |             |
|----|-------------|-------------|-------------|
| Br | 1.06563000  | -0.48400800 | 0.01054200  |
| N  | -5.01001000 | 0.32720900  | -6.70680100 |
| C  | -5.99738200 | 0.39529800  | -7.79511100 |
| H  | -6.32192800 | -0.61953700 | -8.04311100 |
| H  | -6.85391200 | 0.98777100  | -7.46774700 |
| H  | -5.54056100 | 0.87413300  | -8.66438500 |
| C  | -5.40860400 | 0.42748800  | -5.42368100 |
| H  | -6.46278500 | 0.61867800  | -5.24430800 |
| C  | -4.49737800 | 0.30961300  | -4.38993500 |
| H  | -4.87355100 | 0.43563300  | -3.38198900 |
| C  | -3.13155600 | 0.07202700  | -4.65649300 |
| C  | -2.75941900 | -0.03480700 | -6.01709600 |
| H  | -1.73638600 | -0.23261200 | -6.32102700 |
| C  | -3.71452900 | 0.09599900  | -7.00494300 |
| H  | -3.47541400 | 0.02639700  | -8.05989800 |
| C  | -2.14048500 | -0.05141800 | -3.56428200 |
| C  | -2.56304700 | -0.26866000 | -2.23572600 |
| H  | -3.61399600 | -0.38119600 | -1.98702000 |
| C  | -1.63467100 | -0.39443300 | -1.20189400 |
| H  | -1.98770700 | -0.58425500 | -0.19179400 |
| C  | -0.26762100 | -0.31697400 | -1.48974500 |
| C  | 0.17220400  | -0.11338700 | -2.80309100 |
| H  | 1.23485200  | -0.06402300 | -3.02686000 |
| C  | -0.75768800 | 0.02716000  | -3.83497700 |
| H  | -0.39536200 | 0.21219900  | -4.84309400 |
| Br | 3.15359000  | -0.67239900 | 2.50457100  |

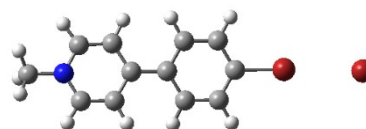

**Structure S4.** The optimized geometry and the corresponding coordinate of the QM region of PYBr crystal at  $T_1$  state

|    |             |             |             |
|----|-------------|-------------|-------------|
| Br | 1.08126500  | -0.48213700 | 0.02659500  |
| N  | -4.98407200 | 0.31358100  | -6.68232900 |
| C  | -5.96613200 | 0.37580900  | -7.76289000 |
| H  | -6.28812200 | -0.63916200 | -8.02297500 |
| H  | -6.83072300 | 0.95746900  | -7.43445300 |
| H  | -5.51628000 | 0.86131800  | -8.63295600 |
| C  | -5.39562500 | 0.35959100  | -5.37891400 |
| H  | -6.45566500 | 0.51584300  | -5.20747500 |
| C  | -4.50060600 | 0.22595500  | -4.35264700 |
| H  | -4.89644900 | 0.29504400  | -3.34740400 |
| C  | -3.08363100 | 0.05742600  | -4.61212800 |
| C  | -2.70823700 | 0.01969200  | -6.01275100 |
| H  | -1.68044000 | -0.12148300 | -6.32891800 |
| C  | -3.66074200 | 0.12488100  | -6.98602500 |
| H  | -3.42600400 | 0.07624000  | -8.04184100 |
| C  | -2.13819600 | -0.07038700 | -3.56952500 |
| C  | -2.55492900 | -0.22233900 | -2.16819000 |
| H  | -3.60568300 | -0.29139900 | -1.91281400 |
| C  | -1.63490500 | -0.35009200 | -1.16386800 |
| H  | -1.97827700 | -0.50695000 | -0.14409500 |
| C  | -0.23073600 | -0.32910500 | -1.45580500 |
| C  | 0.21177200  | -0.19002700 | -2.81269300 |
| H  | 1.27772300  | -0.17713500 | -3.02849800 |
| C  | -0.68980800 | -0.06674900 | -3.83566900 |
| H  | -0.32914600 | 0.05334400  | -4.85215800 |
| Br | 3.14658800  | -0.66739700 | 2.49715700  |

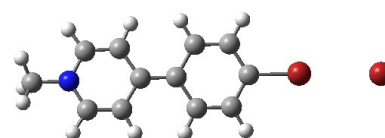

**Structure S5.** The optimized geometry and the corresponding coordinate of the QM region of PYCl/CB[6] crystal at  $S_0$  state

|    |             |             |             |
|----|-------------|-------------|-------------|
| N  | -4.18580300 | -0.96227200 | 0.90556300  |
| C  | -5.36663300 | -1.08582200 | 1.72655400  |
| C  | -3.92885400 | 0.24027100  | 0.40499100  |
| C  | -2.61561200 | 0.59008500  | 0.20278300  |
| C  | -1.63763700 | -0.37913500 | 0.19758100  |
| C  | -2.04113200 | -1.70248000 | 0.33129700  |
| C  | -3.28117300 | -1.94852900 | 0.84013100  |
| C  | -0.23892300 | -0.04313100 | 0.10498400  |
| C  | 0.67599900  | -1.07964300 | 0.18231500  |
| C  | 2.00219500  | -0.80921100 | 0.02007200  |
| C  | 2.52655300  | 0.43603700  | -0.24109600 |
| C  | 1.62148700  | 1.49573000  | -0.09978800 |
| C  | 0.25629600  | 1.26320800  | 0.03844500  |
| Br | 4.46365200  | 0.42701400  | -0.91035400 |
| H  | -5.20676500 | -0.57221000 | 2.67918500  |
| H  | -5.50100700 | -2.14563100 | 1.89128300  |
| H  | -6.20712300 | -0.61548900 | 1.23014400  |
| H  | -4.80343700 | 0.87131800  | 0.30421500  |
| H  | -2.28424200 | 1.60073800  | 0.07877900  |
| H  | -1.34438400 | -2.48346100 | 0.14079500  |
| H  | -3.60883300 | -2.89029200 | 1.25179100  |
| H  | 0.40227800  | -2.11003700 | 0.34157800  |
| H  | 2.63110500  | -1.63053900 | 0.10035100  |
| H  | 1.92047600  | 2.51195500  | -0.03062100 |
| H  | -0.40652400 | 2.12249700  | 0.07970900  |

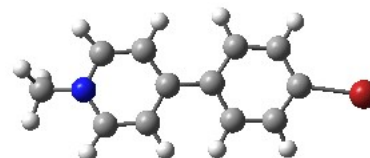

**Structure S6.** The optimized geometry and the corresponding coordinate of the QM region of PYCl/CB[6] crystal at  $T_1$  state

|    |             |             |             |
|----|-------------|-------------|-------------|
| N  | -4.17375300 | -0.97749000 | 0.90893900  |
| C  | -5.33152200 | -1.09993300 | 1.75047400  |
| C  | -3.92178200 | 0.24350900  | 0.39604500  |
| C  | -2.62275700 | 0.60288400  | 0.20055100  |
| C  | -1.61228100 | -0.36763400 | 0.19197100  |
| C  | -2.02371300 | -1.71813000 | 0.33702200  |
| C  | -3.25663500 | -1.97096500 | 0.82928800  |
| C  | -0.26539000 | -0.04035400 | 0.13710800  |
| C  | 0.69480800  | -1.09872800 | 0.22000400  |
| C  | 1.99172400  | -0.82118200 | 0.04452500  |
| C  | 2.53755900  | 0.45467100  | -0.22524900 |
| C  | 1.60208100  | 1.53610600  | -0.05881300 |
| C  | 0.26729600  | 1.31219200  | 0.10457100  |
| Br | 4.42433000  | 0.42819800  | -0.91303600 |
| H  | -5.18323400 | -0.55050500 | 2.68788500  |
| H  | -5.43889100 | -2.15905300 | 1.94858500  |
| H  | -6.19538300 | -0.66794000 | 1.25592300  |
| H  | -4.80450700 | 0.86178700  | 0.29372900  |
| H  | -2.29345400 | 1.61357000  | 0.07245400  |
| H  | -1.32962000 | -2.49455900 | 0.12285000  |
| H  | -3.59896300 | -2.92142300 | 1.20437500  |
| H  | 0.41694300  | -2.12241100 | 0.39944600  |
| H  | 2.63655400  | -1.63102100 | 0.10813900  |
| H  | 1.91500200  | 2.54744400  | 0.03372100  |
| H  | -0.39616900 | 2.16022800  | 0.23435400  |

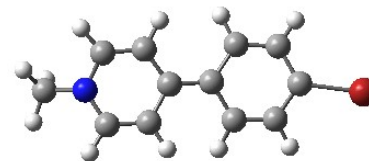

**Structure S7.** The optimized geometry and the corresponding coordinate of the QM region of PYBr/CB[6] crystal at  $S_0$  state

|    |             |             |             |
|----|-------------|-------------|-------------|
| N  | 3.88865300  | 1.75911300  | 0.69310000  |
| C  | 4.94591800  | 2.36432100  | 1.50470200  |
| C  | 2.92951500  | 2.56368800  | 0.23928500  |
| C  | 1.65513500  | 2.05532200  | 0.06416800  |
| C  | 1.42453100  | 0.69927700  | 0.12482400  |
| C  | 2.54883000  | -0.11422700 | 0.24899900  |
| C  | 3.77067800  | 0.42732100  | 0.58799000  |
| C  | 0.06738400  | 0.13570700  | 0.02649800  |
| C  | -1.13238700 | 0.86368900  | -0.11408100 |
| C  | -2.36572400 | 0.20512700  | -0.27396200 |
| C  | -2.41816300 | -1.18454400 | -0.38680300 |
| C  | -1.27165400 | -1.84365100 | -0.01444400 |
| C  | -0.05389900 | -1.23983200 | 0.17059600  |
| H  | 5.37342300  | 3.24158800  | 1.01188900  |
| H  | 5.69358200  | 1.59068000  | 1.67424900  |
| H  | 4.51130100  | 2.67741100  | 2.45507400  |
| H  | 3.23815800  | 3.59412600  | 0.09943900  |
| H  | 0.79744100  | 2.68013000  | -0.07583200 |
| H  | 2.43436900  | -1.16882600 | 0.15538900  |
| H  | 4.66455600  | -0.15041400 | 0.79547500  |
| H  | -1.13642000 | 1.95082900  | -0.08479400 |
| H  | -3.28285100 | 0.74446600  | -0.18001300 |
| H  | -1.31683700 | -2.85438800 | 0.21965100  |
| H  | 0.77691200  | -1.87759500 | 0.43639900  |
| Br | -4.13095900 | -2.34410300 | -0.87503400 |

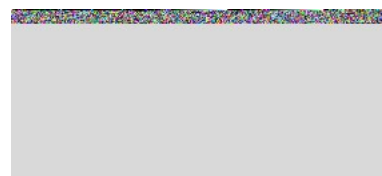

**Structure S8.** The optimized geometry and the corresponding coordinate of the QM region of PYBr/CB[6] crystal at  $T_1$  state

|    |             |             |             |
|----|-------------|-------------|-------------|
| N  | 3.87539500  | 1.72736700  | 0.68087100  |
| C  | 4.91246800  | 2.32416300  | 1.51147100  |
| C  | 2.90449500  | 2.55216700  | 0.21706400  |
| C  | 1.63622700  | 2.06809500  | 0.07138600  |
| C  | 1.36785200  | 0.68451700  | 0.16026200  |
| C  | 2.52967900  | -0.14879700 | 0.25469600  |
| C  | 3.75554200  | 0.38222200  | 0.54009100  |
| C  | 0.07916300  | 0.15937700  | 0.11513100  |
| C  | -1.19635800 | 0.90733600  | 0.01802900  |
| C  | -2.38888000 | 0.25844900  | -0.20887400 |
| C  | -2.43273200 | -1.16051900 | -0.42224400 |
| C  | -1.27262800 | -1.84005200 | 0.01736200  |
| C  | -0.08379200 | -1.27020400 | 0.27948400  |
| H  | 5.35587300  | 3.19817400  | 1.02287500  |
| H  | 5.65485700  | 1.55086700  | 1.70738600  |
| H  | 4.46606300  | 2.66222300  | 2.44978800  |
| H  | 3.22918800  | 3.57547300  | 0.06363400  |
| H  | 0.77951000  | 2.69087800  | -0.08245100 |
| H  | 2.39849800  | -1.20054400 | 0.14220000  |
| H  | 4.66162900  | -0.19812700 | 0.67833200  |
| H  | -1.20337900 | 1.98135000  | 0.18205100  |
| H  | -3.31608400 | 0.77991000  | -0.09697200 |
| H  | -1.36034100 | -2.85153300 | 0.23212700  |
| H  | 0.71968300  | -1.89568800 | 0.63817000  |
| Br | -4.12165700 | -2.32846700 | -0.88122700 |

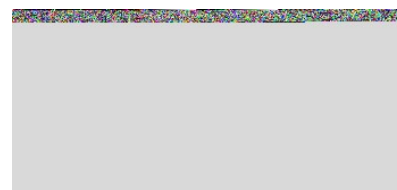

**Structure S9.** The optimized geometry and the corresponding coordinate of the QM region of PYCl/CB[7],  $S_0$  state

|    |              |            |             |
|----|--------------|------------|-------------|
| N  | -6.12123700  | 1.52645000 | 0.20749200  |
| C  | -5.27423700  | 1.27414300 | -0.97942700 |
| C  | -5.67823500  | 2.33116500 | 1.19532300  |
| C  | -6.46501700  | 2.63061300 | 2.29572100  |
| C  | -7.77749200  | 2.11771600 | 2.38687100  |
| C  | -8.17866100  | 1.23711800 | 1.36260300  |
| C  | -7.33843300  | 0.95488400 | 0.30335600  |
| C  | -8.73047900  | 2.54411500 | 3.43501900  |
| C  | -10.08134500 | 2.71903700 | 3.08304800  |
| C  | -10.99634300 | 3.24098000 | 3.99790300  |
| C  | -10.53757600 | 3.57163000 | 5.27185000  |
| C  | -9.21769200  | 3.35417600 | 5.67270400  |
| C  | -8.30931300  | 2.83905900 | 4.74343100  |
| H  | -4.71715400  | 2.18703600 | -1.20444300 |
| H  | -5.92064600  | 1.01141600 | -1.81946200 |
| H  | -4.57826900  | 0.45248800 | -0.79342700 |
| H  | -4.69003800  | 2.74431200 | 1.04351400  |
| H  | -6.08052500  | 3.30438400 | 3.05606700  |
| H  | -9.14146200  | 0.74755600 | 1.42175000  |
| H  | -7.61170900  | 0.26711300 | -0.48607400 |
| H  | -10.43011100 | 2.48134800 | 2.08490800  |
| H  | -12.02839900 | 3.38780700 | 3.69700600  |
| H  | -8.88739800  | 3.57847800 | 6.68212800  |
| H  | -7.29312000  | 2.62739000 | 5.05972700  |
| Br | -11.83808300 | 4.41348600 | 6.57084000  |

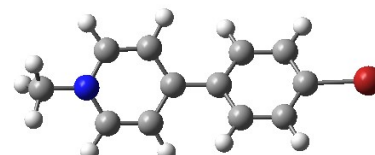

**Structure S10.** The optimized geometry and the corresponding coordinate of the QM region of PYCl/CB[7],  $T_1$  state

|    |              |            |             |
|----|--------------|------------|-------------|
| N  | -6.23385300  | 1.55240100 | 0.15580200  |
| C  | -5.34850400  | 1.27741500 | -0.98188100 |
| C  | -5.70449900  | 1.74434300 | 1.40696600  |
| C  | -6.49830200  | 2.02178500 | 2.48717800  |
| C  | -7.93662900  | 2.14109400 | 2.34914900  |
| C  | -8.43476600  | 1.93346400 | 1.00478500  |
| C  | -7.58438700  | 1.65630100 | -0.02881100 |
| C  | -8.79232600  | 2.49182300 | 3.41994600  |
| C  | -10.23540800 | 2.68766500 | 3.20801600  |
| C  | -11.01956500 | 3.27899600 | 4.15739900  |
| C  | -10.44130900 | 3.66321700 | 5.40486400  |
| C  | -9.08113800  | 3.35343300 | 5.72026000  |
| C  | -8.28681300  | 2.75815400 | 4.77688700  |
| H  | -4.81687400  | 2.19746400 | -1.25415600 |
| H  | -5.94795300  | 0.91911500 | -1.82091300 |
| H  | -4.62344700  | 0.50139400 | -0.72544300 |
| H  | -4.62487200  | 1.67625800 | 1.46760900  |
| H  | -6.01887700  | 2.15238200 | 3.45060700  |
| H  | -9.49253800  | 1.99143900 | 0.78452100  |
| H  | -7.92709800  | 1.51692000 | -1.04481300 |
| H  | -10.70407400 | 2.36855100 | 2.29041100  |
| H  | -12.07386200 | 3.43795900 | 3.95569200  |
| H  | -8.67712500  | 3.57444100 | 6.70378400  |
| H  | -7.27645200  | 2.48229900 | 5.04867200  |
| Br | -11.59445400 | 4.57198900 | 6.75111400  |

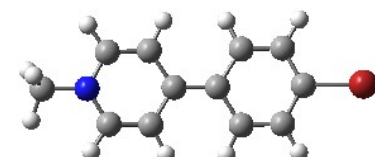

**Structure S11.** The optimized geometry and the corresponding coordinate of the QM region of PYBr/CB[7],  $S_0$  state

|    |              |            |             |
|----|--------------|------------|-------------|
| N  | -6.06168000  | 1.48056800 | 0.27588500  |
| C  | -5.21892000  | 1.27696800 | -0.92354800 |
| C  | -5.56928000  | 2.13398300 | 1.34710700  |
| C  | -6.36857300  | 2.45494200 | 2.43222100  |
| C  | -7.73798200  | 2.11351000 | 2.42834300  |
| C  | -8.18301800  | 1.33684100 | 1.33840400  |
| C  | -7.33442000  | 1.03866800 | 0.29052600  |
| C  | -8.68939800  | 2.61271000 | 3.44790900  |
| C  | -8.28298100  | 2.90889700 | 4.76232300  |
| C  | -9.18126800  | 3.49100900 | 5.66215400  |
| C  | -10.47756300 | 3.77487700 | 5.22861000  |
| C  | -10.92205500 | 3.45889700 | 3.94620300  |
| C  | -10.01775500 | 2.87284500 | 3.06002500  |
| H  | -5.87541000  | 1.20402500 | -1.79345900 |
| H  | -4.62675600  | 0.36373300 | -0.84050500 |
| H  | -4.55267800  | 2.13731100 | -1.02354500 |
| H  | -4.52561300  | 2.40728500 | 1.27722900  |
| H  | -5.93882700  | 3.01446800 | 3.25658700  |
| H  | -9.19097500  | 0.94536000 | 1.32773300  |
| H  | -7.64162900  | 0.44217700 | -0.55808300 |
| H  | -7.28422700  | 2.66169200 | 5.10958500  |
| H  | -8.85967600  | 3.71618300 | 6.67429800  |
| H  | -11.93475100 | 3.66874900 | 3.61795500  |
| H  | -10.35776600 | 2.65450100 | 2.05381100  |
| Br | -11.76388100 | 4.69977800 | 6.48556800  |

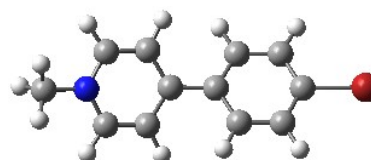

**Structure S12.** The optimized geometry and the corresponding coordinate of the QM region of PYBr/CB[7],  $T_1$  state

|    |              |            |             |
|----|--------------|------------|-------------|
| N  | -5.94344300  | 1.62875300 | 0.33481400  |
| C  | -4.99118200  | 1.45073500 | -0.76814400 |
| C  | -5.50119900  | 1.93212200 | 1.59364100  |
| C  | -6.36738800  | 2.17618900 | 2.62408200  |
| C  | -7.79995900  | 2.15686700 | 2.41075500  |
| C  | -8.20774700  | 1.73160800 | 1.08427300  |
| C  | -7.28539900  | 1.47598600 | 0.10862900  |
| C  | -8.72129900  | 2.58801000 | 3.39149800  |
| C  | -8.30926700  | 2.91740500 | 4.76837600  |
| C  | -9.17876700  | 3.52166300 | 5.63894800  |
| C  | -10.51487400 | 3.80478000 | 5.22161900  |
| C  | -10.99220100 | 3.41365000 | 3.93303200  |
| C  | -10.13401200 | 2.81173400 | 3.05554900  |
| H  | -5.45549700  | 1.82691800 | -1.68414100 |
| H  | -4.73228700  | 0.39506900 | -0.89926200 |
| H  | -4.07994600  | 2.01149700 | -0.54548900 |
| H  | -4.42802600  | 1.96536200 | 1.70868000  |
| H  | -5.95253700  | 2.40764300 | 3.59743500  |
| H  | -9.25086300  | 1.57476500 | 0.84767200  |
| H  | -7.54920500  | 1.14474600 | -0.88723000 |
| H  | -7.31702800  | 2.65911100 | 5.11936200  |
| H  | -8.85072900  | 3.76890300 | 6.64444100  |
| H  | -12.02111600 | 3.59371900 | 3.63757900  |
| H  | -10.50777600 | 2.53917300 | 2.08025200  |
| Br | -11.76305800 | 4.74756500 | 6.46255400  |

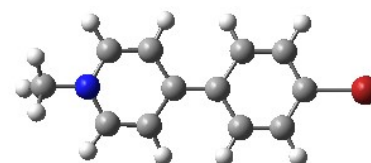

Supplement: d4cp00891j1.pdf [file d4cp00891j1.pdf]
